# Supplementary material for: Extreme parsimony in ATP consumption by 20S complexes in the global disassembly of single SNARE complexes
Source: PubMed Central journal article supplement (PMC8163800; doi:10.1038/s41467-021-23530-0), 2021-05-28
Supplement: 41467_2021_23530_MOESM1_ESM.pdf [file 41467_2021_23530_MOESM1_ESM.pdf]

1 **Extreme parsimony in ATP consumption by**  
2 **20S complexes in the global disassembly of single**  
3 **SNARE complexes**

4 Changwon Kim<sup>1,7</sup>, Min Ju Shon<sup>1,2,7</sup>, Sung Hyun Kim<sup>1,6</sup>, Gee Sung Eun<sup>1</sup>, Je-Kyung Ryu<sup>3,6</sup>,  
5 Changbong Hyeon<sup>4</sup>, Reinhard Jahn<sup>5</sup> and Tae-Young Yoon<sup>1,\*</sup>

6 <sup>1</sup>School of Biological Sciences and Institute for Molecular Biology and Genetics, Seoul  
7 National University, Seoul 08826, South Korea

8 <sup>2</sup>Department of Physics, Pohang University of Science and Technology, Pohang, Gyeongbuk  
9 37673, South Korea

10 <sup>3</sup>Department of Physics, KAIST, Daejeon 305-701, South Korea

11 <sup>4</sup>Korea Institute for Advanced Study, Seoul 02455, South Korea

12 <sup>5</sup>Department of Neurobiology, Max-Planck-Institute for Biophysical Chemistry, 37077  
13 Göttingen, Germany

14 <sup>6</sup>Present address: Department of Bionanoscience, Kavli Institute of Technology, Delft  
15 University of Technology, the Netherlands

16 <sup>7</sup>These authors equally contributed to this work.

17 \*Correspondence: [tyyoon@snu.ac.kr](mailto:tyyoon@snu.ac.kr).

18 Content:

19 Supplementary Figs. 1-8

20 Supplementary References

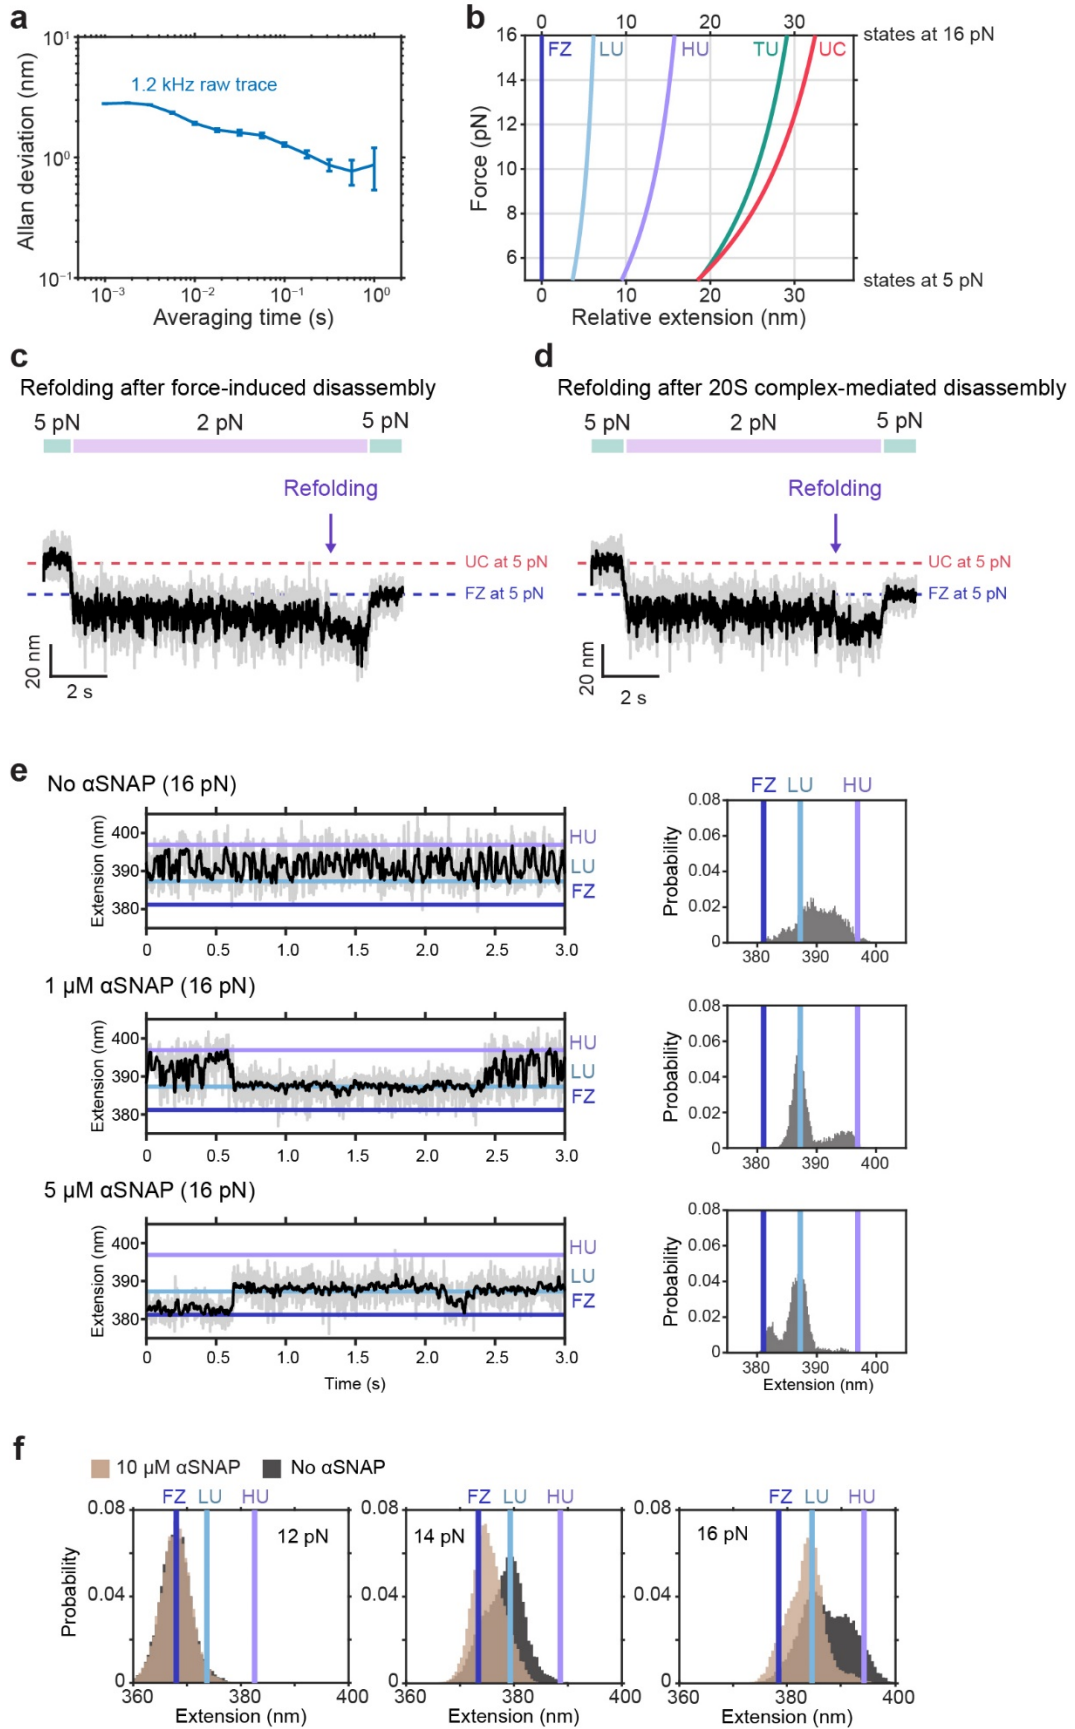

22 **Supplementary Fig. 1 Modeling and monitoring extensions of SNARE complexes.**

23 **a** The Allan deviation of bead position as a function of averaging time for our high speed (1.2  
24 kHz) trace. Error bars represent standard errors for 5 repeated measurements on the same  
25 construct. **b** Relative extension of the states of the SNARE complex at varying forces. The  
26 lines are the WLC model assuming a persistent length of 0.77 nm. **c, d** Representative  
27 refolding traces of the SNARE complex after force-induced disassembly (**c**) and 20S  
28 complex-mediated disassembly (**d**). **e** Representative trace and extension histogram of Fully-  
29 zippered, Linker-unzipped, and Half-unzipped states under 16 pN of force at different  
30  $\alpha$ SNAP concentrations. **f** Extension histogram of Fully-zipped, Linker-unzipped, and Half-  
31 unzipped states under different forces (12 pN, 14 pN, 16 pN) with or without  
32  $\alpha$ SNAP. Throughout the figure, gray and black traces are 1.2-kHz raw and 60-Hz-filtered  
33 traces, respectively. FZ: fully-zipped; LU: linker-unzipped; HU: half-unzipped; TU: totally-  
34 unzipped; UC: unstructured-coil.

35

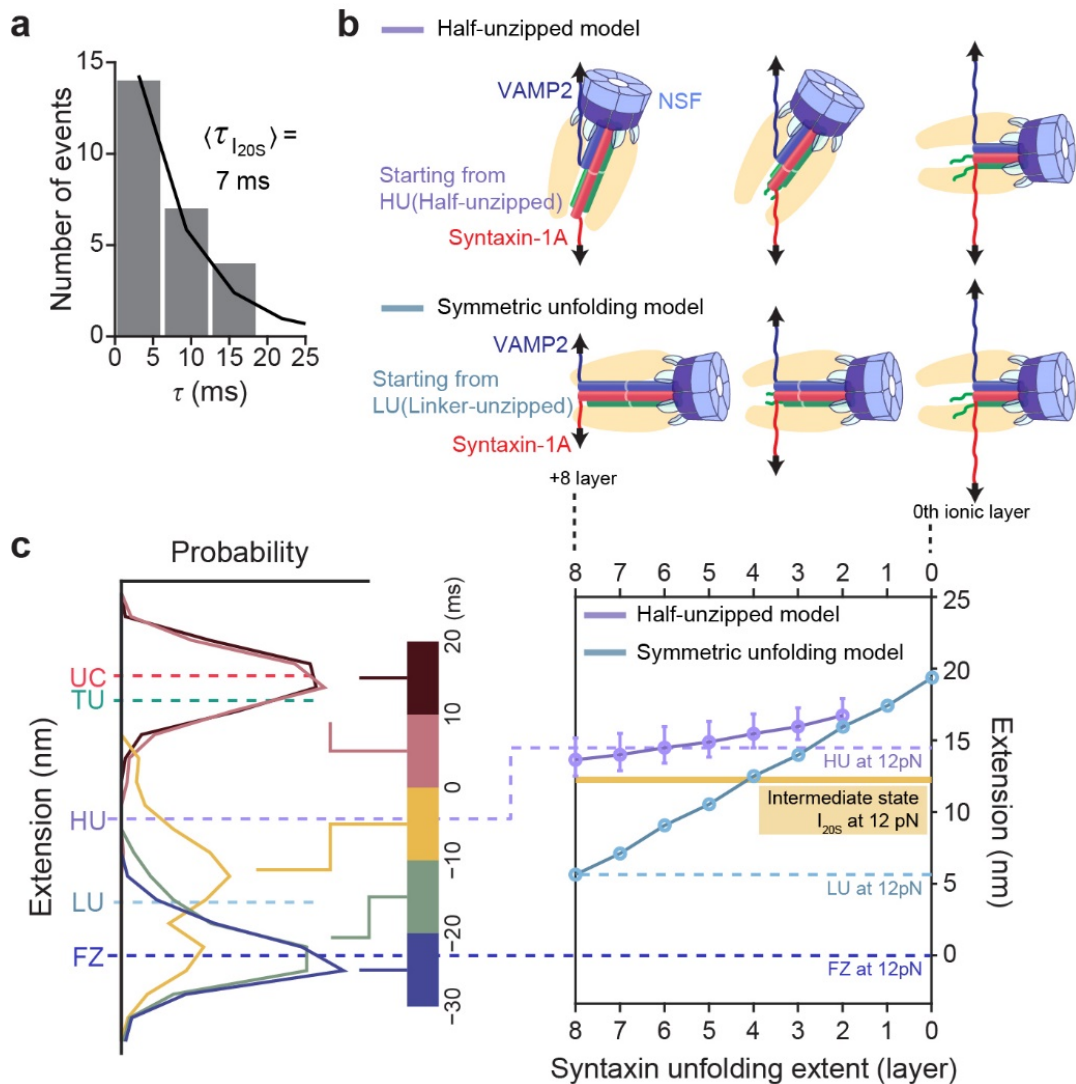

36 **Supplementary Fig. 2 Model of SNARE complex unzipping and characterization of the**  
 37 **intermediate state.**

38 **a** Dwell time distribution of the intermediate state for the same data as in Fig. 1i ( $N = 26$ ). **b**  
 39 Schematic model of SNARE complexes, following two different models regarding the  
 40 intermediate state. The half-unzipped model starts from the HU state with unfolded VAMP2  
 41 from the beginning. The symmetric-unfolding model starts from the LU state, and VAMP2  
 42 symmetrically unfolds with syntaxin.  
 43 **c** Two models (Half-unzipped, Symmetric-unfolding)  
 44 plotted with the extent of syntaxin unfolding and extension level. In the half-unzipped model,  
 45 the lower extent and upper extent of error bar demonstrate VAMP2 unfolding to +2 layer and  
 46 to 0 layer, respectively<sup>1</sup>. The extension level at the intermediates (yellow line) is positioned  
 between HU and LU and meets with the Symmetric-unfolding model plot (cyan-blue line).

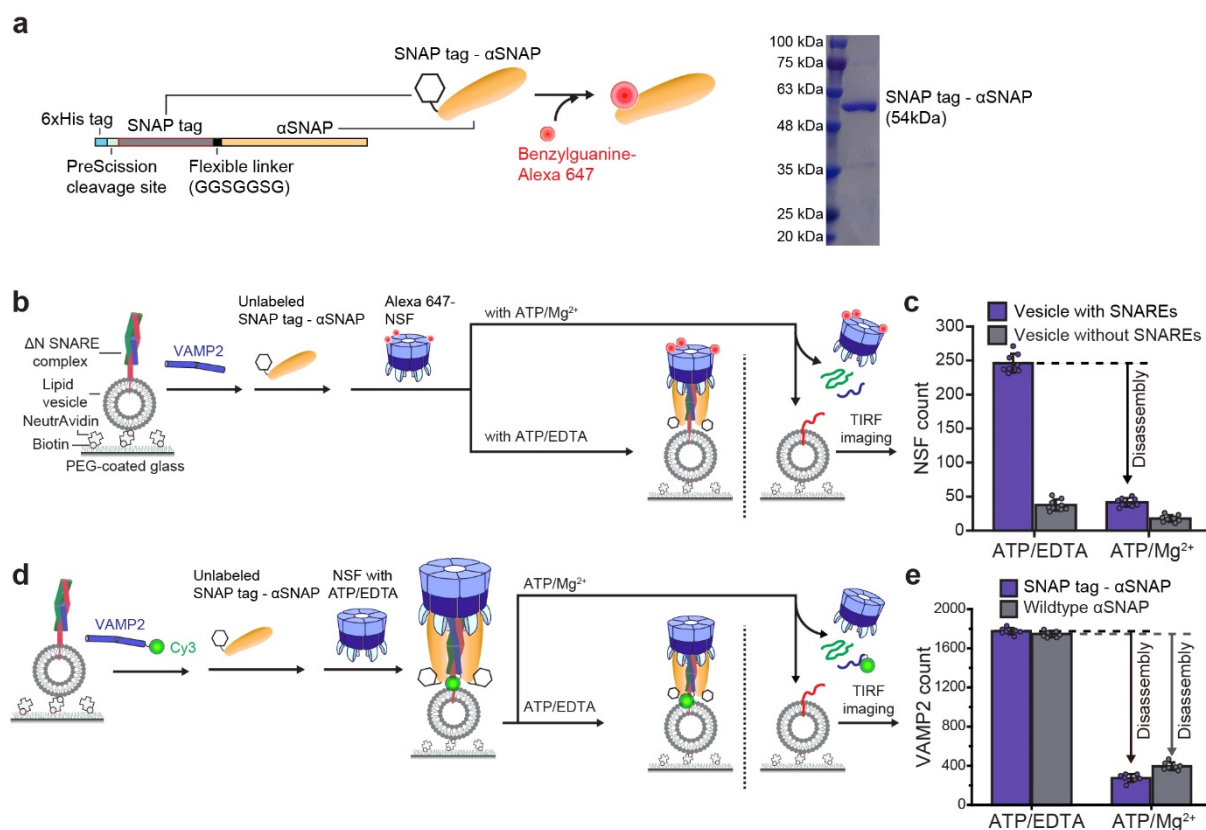

47

48 **Supplementary Fig. 3 Control experiments for SNAP tag fused αSNAP.**

49 **a** Design of SNAP tag-αSNAP with flexible linker and His tag/PreScission cleavage site for  
50 purification. After purification, SNAP tag was labeled with Benzyguanine(BG)-Alexa647  
51 dye. SDS-PAGE gel image of SNAP tag-αSNAP after affinity and size exclusion  
52 chromatography. A representative gel is shown from three independent experiments. Full gels  
53 are shown in Source data file. **b** Schematic for measuring the Alexa647-labeled NSF count  
54 during NSF-mediated SNARE complex disassembly using unlabeled SNAPtag-αSNAP. The  
55 schematic shows successful trapping of the 20S complex in 1 mM ATP/1 mM EDTA and  
56 following disassembly under 1 mM ATP/10 mM Mg<sup>2+</sup> condition. **c** The number of labeled  
57 NSF spots under the two conditions in **(b)** with SNARE reconstituted vesicles or vesicles  
58 without SNAREs as a negative control. **d** Schematic for measuring the Cy3-labeled VAMP2  
59 count during 20S complex-mediated SNARE complex disassembly. After assembling the 20S  
60 complex with 1 mM ATP/1 mM EDTA, the complex was incubated with 1 mM ATP/1 mM  
61 EDTA or 1 mM ATP/10 mM Mg<sup>2+</sup> for disassembly. **e** The number of Cy3-VAMP2 spots  
62 under the two conditions described in **(d)** using SNAP tag-αSNAP and wild type αSNAP.  
63 Error bars in **(c and e)** represent mean ± s.d. for n=8 **(c)** and n=7 **(e)** images from 2 independent

64 experiments. Source data are provided as a Source Data file.

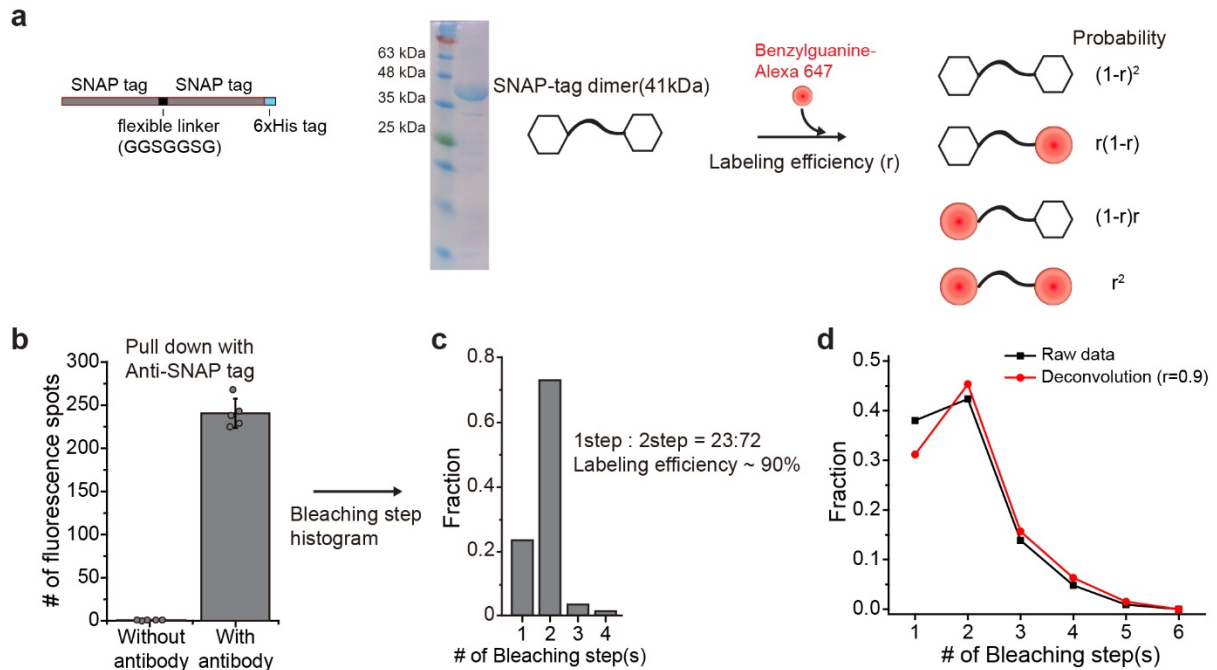

65

66 **Supplementary Fig. 4 The measurement of labeling efficiency to create deconvoluted**  
67 **photobleaching histograms.**

68 **a** The design of the SNAP tag dimer with a flexible linker and a His tag for purification.

69 SDS-PAGE gel image of SNAP tag dimer after affinity and size exclusion chromatography.

70 The theoretical probability was calculated for four different labeling cases where r is labeling

71 efficiency. A representative gel is shown from two independent gel from same sample. Full

72 gels are shown in Source data file. **b** Characterization of SNAP tag dimer using an anti-SNAP

73 tag antibody. **c** Distribution of the photobleaching step(s) of SNAP tag dimer (N = 672

74 molecules), indicating a high labeling efficiency,  $r \sim 0.9$ . **d** Example of the deconvoluted

75 photobleaching step(s) considering 90% labeling efficiency compared to the raw data. The

76 detail is described in method. Error bars in **(b)** represent mean  $\pm$  s.d. for n=5 images. Source

77 data are provided as a Source Data file.

78

79

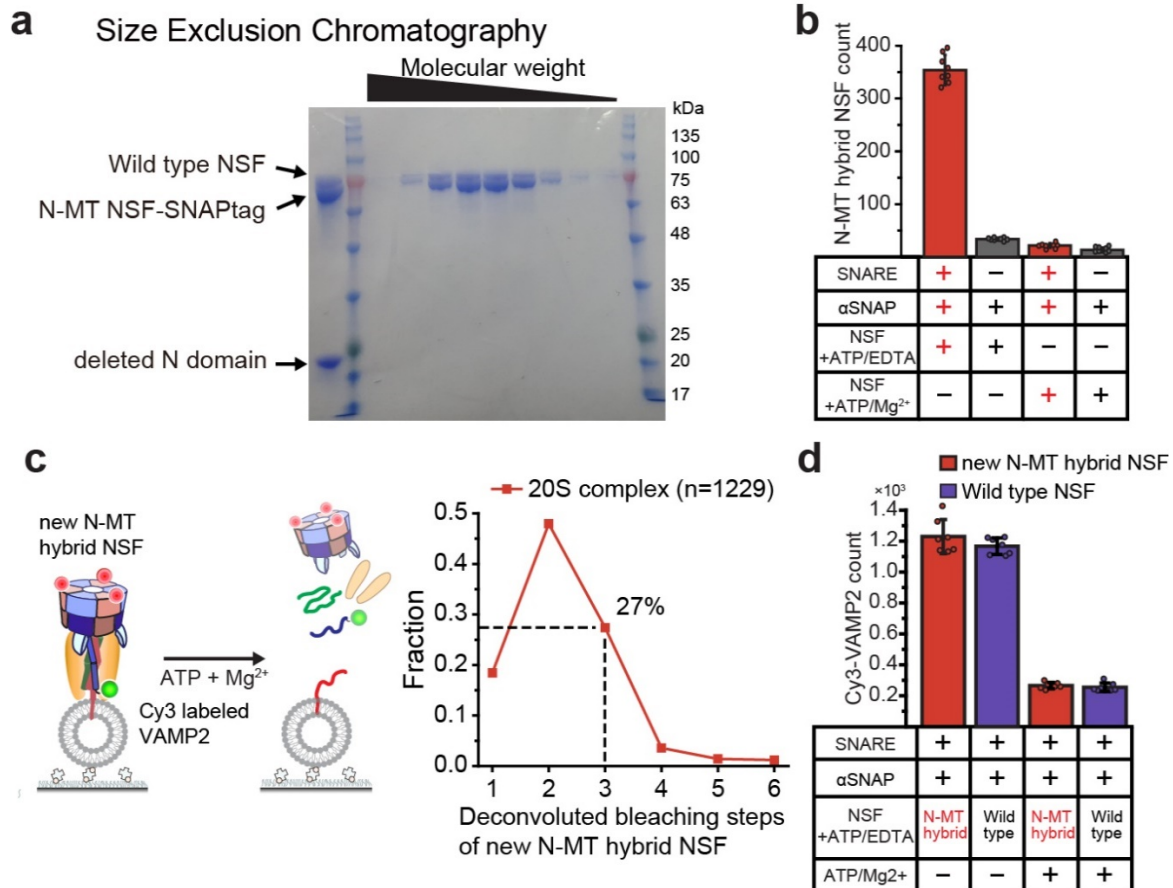

80

81

82 **Supplementary Fig. 5 Preparation and additional experiments for N-MT hybrid NSF.**

83 **a** SDS-PAGE gel image of N-MT hybrid NSF after affinity and size exclusion

84 chromatography (SEC). N domains of N-5MT NSF protomers deleted by PreScission were

85 removed during SEC. A representative gel is shown from two independent gel from same

86 sample. **b** Counts for N-MT hybrid NSF under ATP-non-hydrolyzing (1 mM ATP/1 mM

87 EDTA) and hydrolyzing (1 mM ATP/10 mM Mg<sup>2+</sup>) conditions. **c** The distributions of

88 deconvoluted photobleaching step(s) for new N-MT hybrid NSF (N = 1229 molecules)

89 binding to SNARE- $\alpha$ SNAP complex. New N-MT hybrid NSF consisted of a larger fraction

90 of N-MT subunits than used in Fig. 3. **d** Comparison of SNARE disassembly activity of wild

91 type NSF and new N-MT hybrid NSF while inducing ATP hydrolysis (+ATP/Mg<sup>2+</sup>) in pre-

92 made 20S complex. Error bars in (**b** and **d**) represent mean  $\pm$  s.d. for n=7 (**b**) and n=7 (**d**)

93 images from 2 independent experiments. Source data are provided as a Source Data file.

94

**a** Fluorescence time trace(FRET)

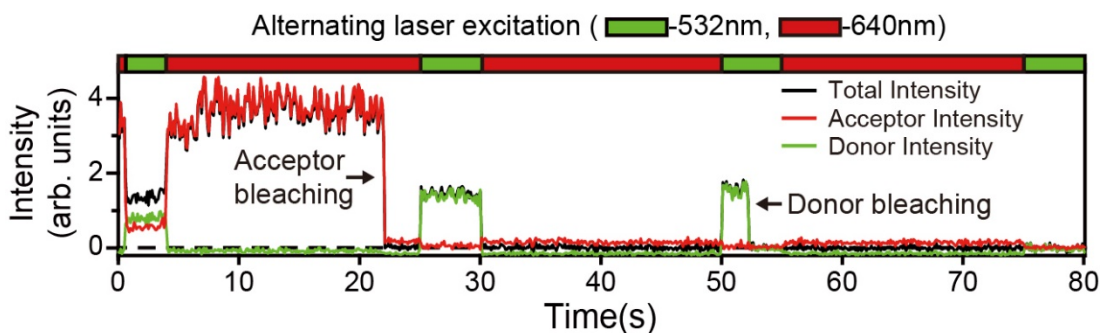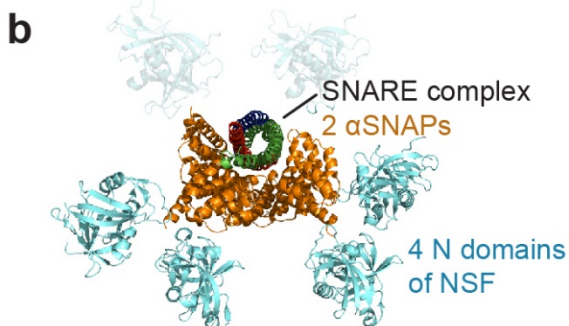

95

96 **Supplementary Fig. 6 Alternating excitation for single pair FRET experiments and**  
97 **structure of 20S complex.**

98 **a** Full representative trace of a FRET measurement. Alternating laser excitation was used to  
99 select NSF with one donor and one acceptor dye from the photobleaching step. The

100 fluorescence time trace in Fig. 4 was created by collecting the traces only when excitation of

101 the green (532 nm) laser. **b** The 20S complex structure containing two  $\alpha$ SNAPs interacting

102 with four N domains of NSF (PDB ID: 6MDM<sup>2</sup>). The remaining two N domains of the NSF

103 were not included in the structure, but are marked transparently.



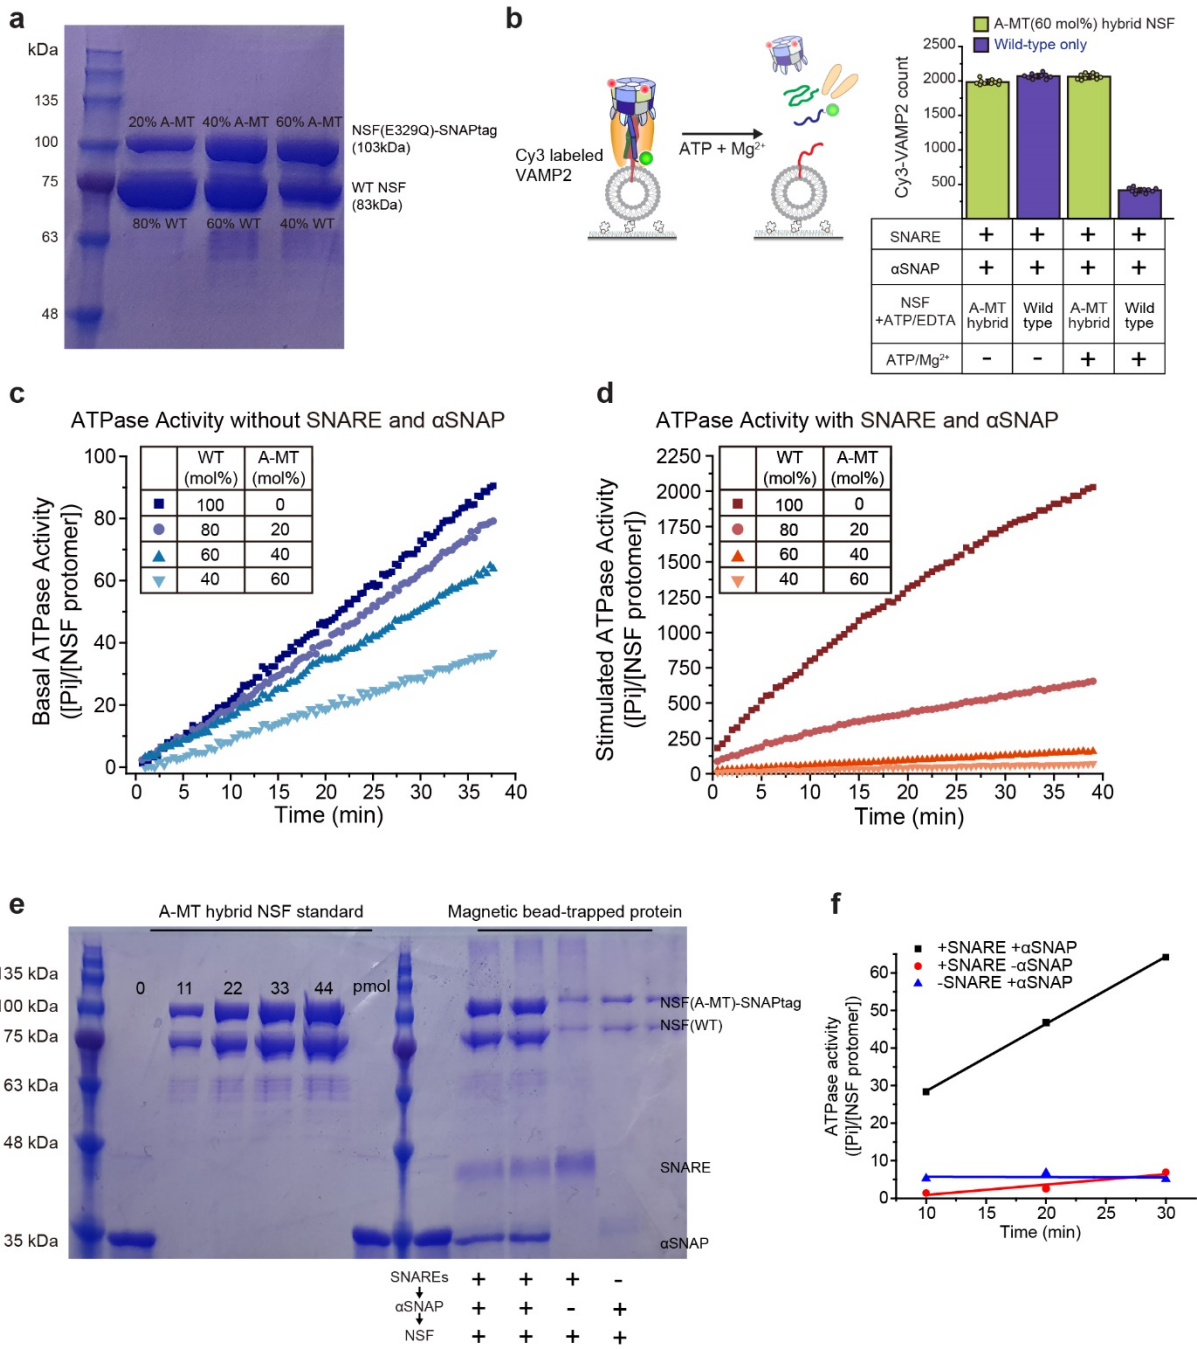

104

105 **Supplementary Fig. 7 Preparation of A-MT hybrid NSF and detailed results from the**  
 106 **ATPase assay.**

107 **a** SDS-PAGE gel image of A-MT hybrid NSF at different (20%, 40%, 60%) A-MT protomer  
 108 ratios. A representative gel is shown from two independent gel from same sample. Full gels  
 109 are shown in Source data file. **b** Measurements of SNARE disassembly activity of A-MT  
 110 (60%) hybrid NSF compared to WT NSF. 20S complex was pre-formed under non-  
 111 hydrolyzing (1 mM ATP/1 mM EDTA) conditions and SNARE disassembly was induced by

112 buffer exchange to 1 mM ATP/10 mM Mg<sup>2+</sup> for 5 minutes. **c, d** Kinetic curves for free NSF  
113 ATPase activity at four different A-MT protomer ratios without (**c**) or with (**d**) SNARE (300  
114 nM) and  $\alpha$ SNAP (1  $\mu$ M). **e** Full image of the SDS-PAGE gel in Fig. 5h. The amounts of the  
115 standard samples were measured using the Bradford assay before loading. After the ATPase  
116 activity measurements, magnetic bead-trapped protein was solubilized and loaded with SDS-  
117 PAGE loading dye. **f** Representative kinetic curves of ATPase activity for magnetic bead-  
118 trapped NSF with or without SNARE and  $\alpha$ SNAP. Error bars in (**b**) represent mean  $\pm$  s.d. for  
119 n=10 images. Source data are provided as a Source Data file.

120

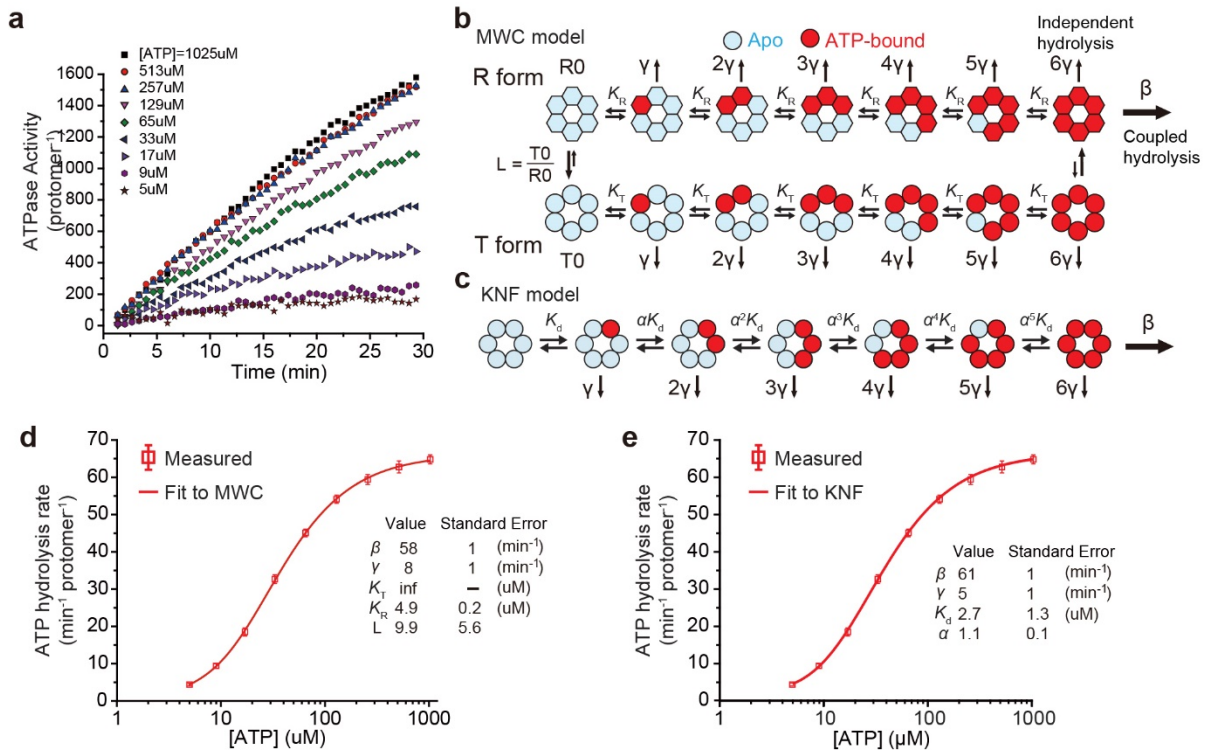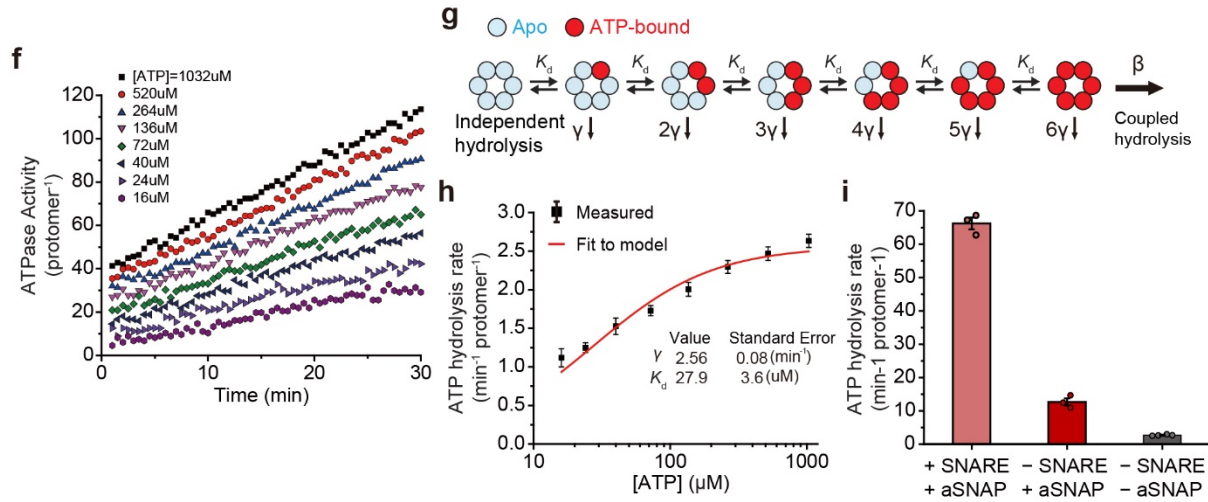

124 **Supplementary Fig. 8: Additional fitting and experiments for NSF's ATPase activity.**  
125 **a, f** Representative kinetic curves of NSF's ATPase activity in the 20S complex (**a**) and free  
126 NSF (**f**) using various ATP concentrations. **b, c** Cooperative model for ATP binding and  
127 hydrolysis of NSF in the 20S complex based on the MWC model (**b**) and KNF model (**c**). **d**  
128 Fitting result from the model described in (**b**). The infinite value of the  $K_T$  means ATP-bound  
129 NSF exists only in the R form and that this result reduces the model in (**b**) to the one-layer  
130 model described in Fig. 6a. **e** Fitting result from the model described in (**c**). Since the scaling  
131 factor  $\alpha$  is nearly 1, the model is also reduced to what is described in Fig. 6a. **g** Model of ATP  
132 hydrolysis cycle for free NSF with the same dissociation constant  $K_d$ . **h** Fitting result from the  
133 model described in (**g**). The fit did not converge well. **i** The effect of  $\alpha$ SNAP to the ATPase  
134 activity of NSF without SNARE complex. The  $+/+$  and  $-/-$  data are the same data in Fig. 5.  
135 The data in (**d**, **e** and **h**) are the same as those in Fig. 6. The  $-/+$  data in (**i**) is mean  $\pm$  s.e.m. for  
136 3 independent experiments.  $K_T$ ,  $K_R$ , and  $K_d$ : dissociation constant for ATP binding in  
137 subunits;  $\gamma$ : independent hydrolysis rate;  $\beta$ : coupled hydrolysis rate;  $L$ : allosteric constant, that  
138 is the ratio of proteins in the T and R form in the absence of ATP.  $\alpha$ : scaling factor for  $K_d$ .  
139 Source data are provided as a Source Data file.

140

141

## 142 **Supplementary References**

- 143 1. Gao, Y. et al. Single Reconstituted Neuronal SNARE Complexes Zipper in Three  
144 Distinct Stages. *Science* **337**, 1340 (2012).
- 145 2. White, K.I., Zhao, M., Choi, U.B., Pfuetzner, R.A. & Brunger, A.T. Structural  
146 principles of SNARE complex recognition by the AAA+ protein NSF. *Elife* **7**(2018).

147
